# Supplementary material for: End-binding 1 protein overexpression correlates with glioblastoma progression and sensitizes to Vinca-alkaloids in vitro and in vivo
Source: PubMed Central journal article supplement (PMC4350359; doi:10.18632/oncotarget.2646), 2014-11-28
Supplement: oncotarget-05-12769-s001.pdf [file oncotarget-05-12769-s001.pdf]

## SUPPLEMENTARY FIGURES, TABLE, MOVIES

A

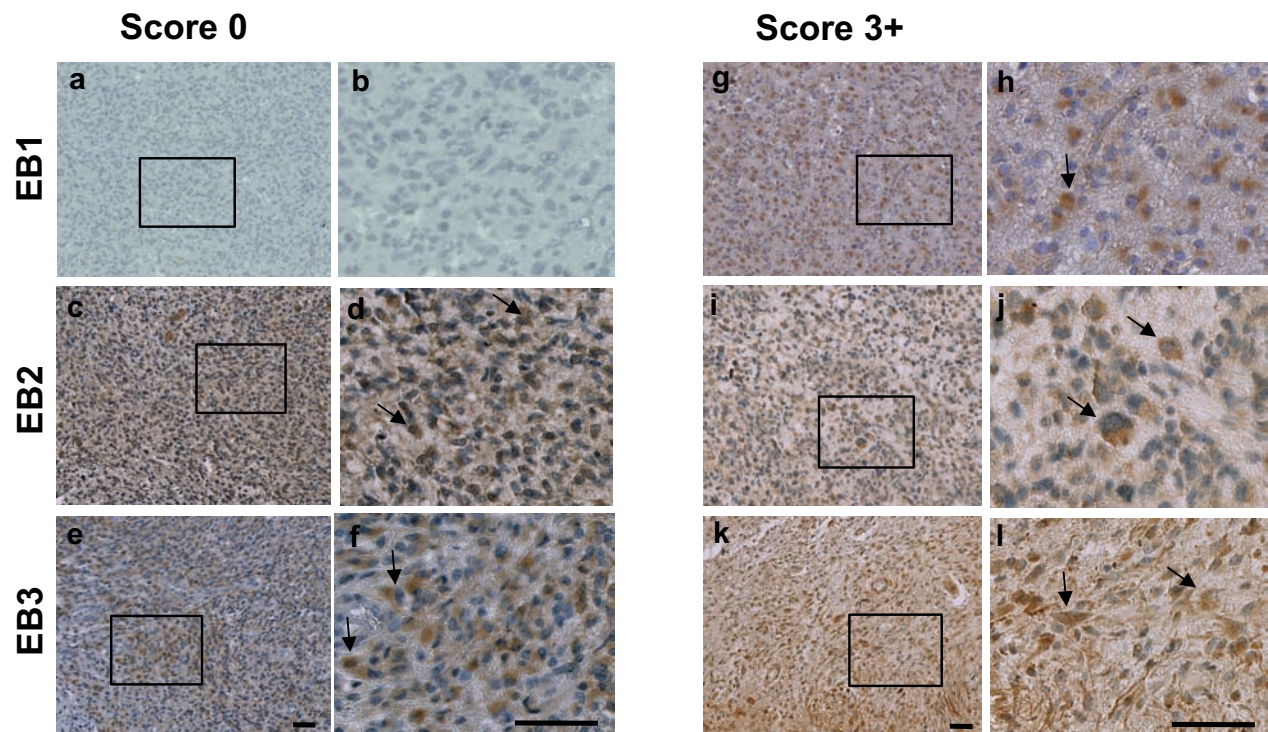

B

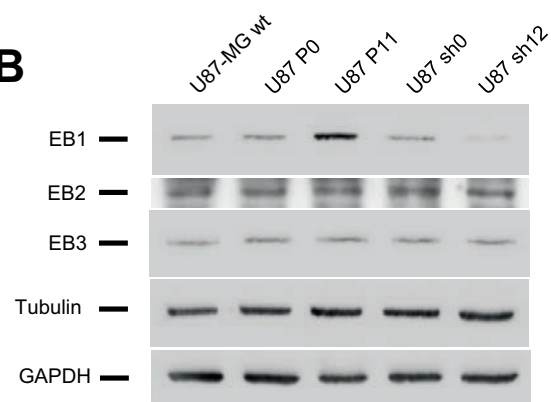

**Supplementary Figure S1: Expression of EB2 or EB3 proteins according to EB1 scoring in glioblastoma.** (A) Immunohistochemical analysis of expression of EB2 (c, d and i, j) and EB3 (e, f and k, l) in paraffin sections of glioblastoma tissue with low (score 0) or high expression (score 3+) of EB1 (a, b and g, h). Arrows on magnified images show the cytoplasmic localization of EB proteins in glioma cells (right columns). *Bar*=50  $\mu$ m. (B) Western blot analysis of EB2 and EB3 levels in EB1 down-regulating clone (U87 sh12), EB1 overexpressing clone (U87 P11) or control clones (U87-MG wt, sh0 and P0).

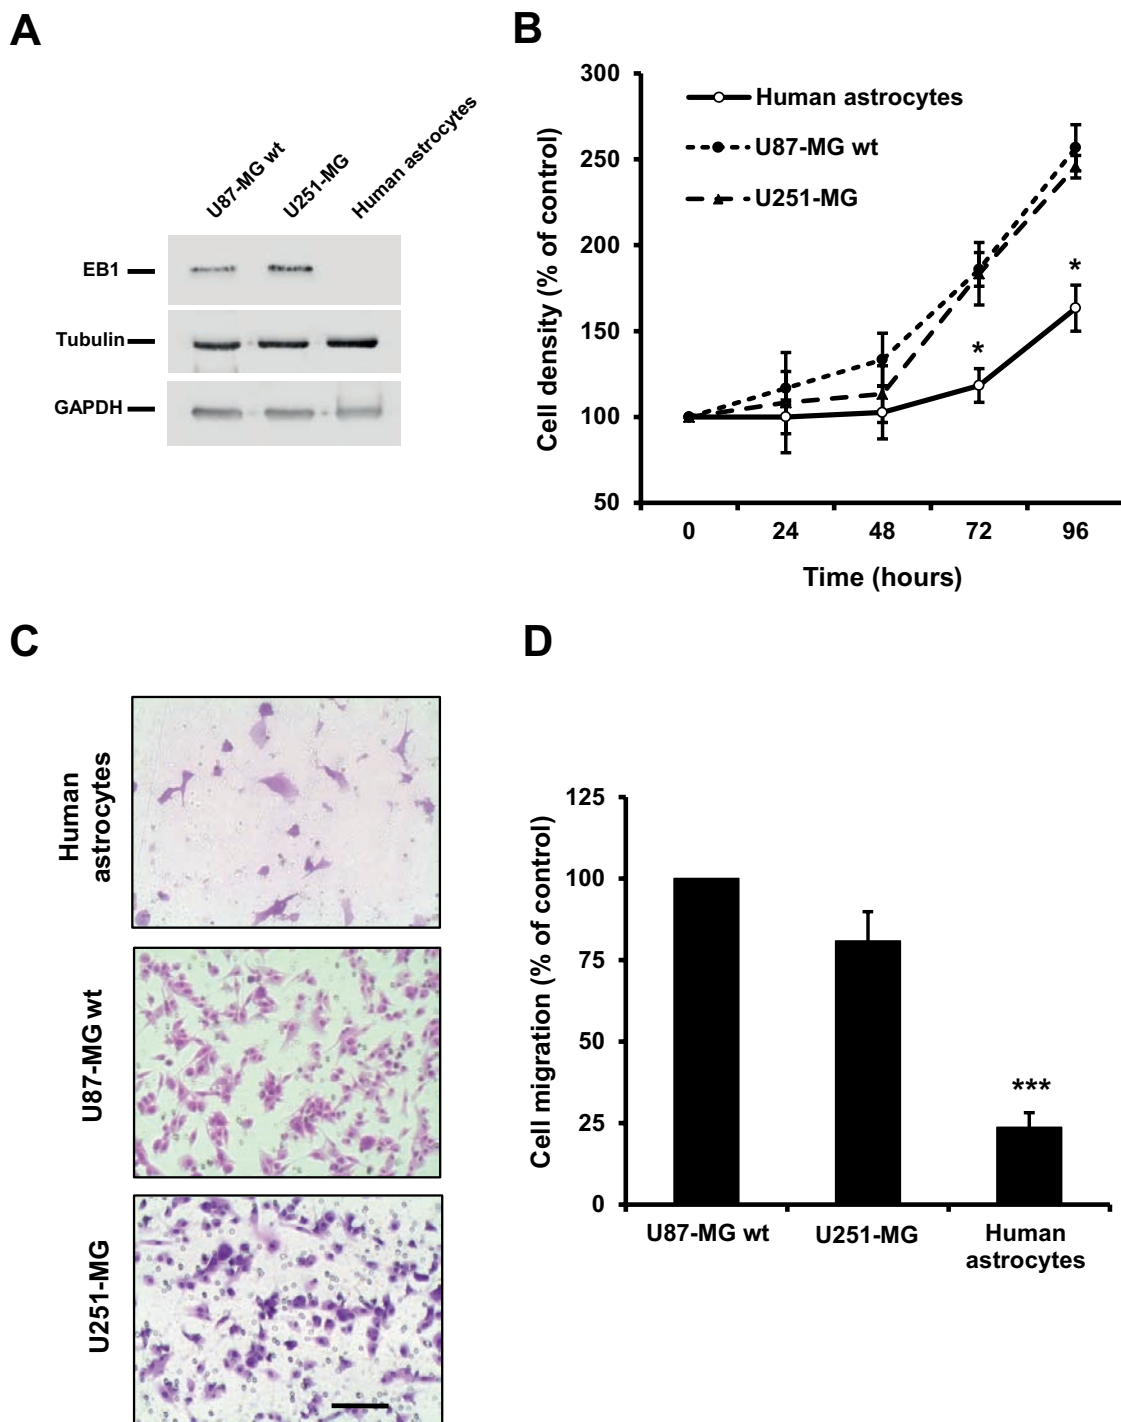

**Supplementary Figure S2: undetectable level of EB1 expression in astrocytes is associated with poor migration and growth.** (A) Analysis of EB1 expression level by Western blot of normal human astrocytes in comparison with U87-MG wt and U251-MG wt cells. (B) Sulforhodamine B cell density assay of normal human astrocytes in comparison with U87-MG wt and U251-MG wt cells. At each time, analysis were performed in sixplicates. At least three independent experiments were performed for each condition. Bar  $\pm$  SEM. (\*) indicates significant difference from U87-MG wt control cells: \* $p < 0.05$ . (C) Representative images of migratory normal human astrocytes in comparison with U87-MG and U251-MG cells, using the transwell migration assay (crystal violet staining, magnification of 100 $\times$ ). (D) Quantification of migratory cells, as determined by counting the cell number under the microscope with a magnification of 100 $\times$ , in the transwell migration assay. At least three independent experiments were performed for each condition. Bar  $\pm$  SEM. (\*) indicates significant differences from U87 control cells: \*\*\* $p < 0.001$ .

A

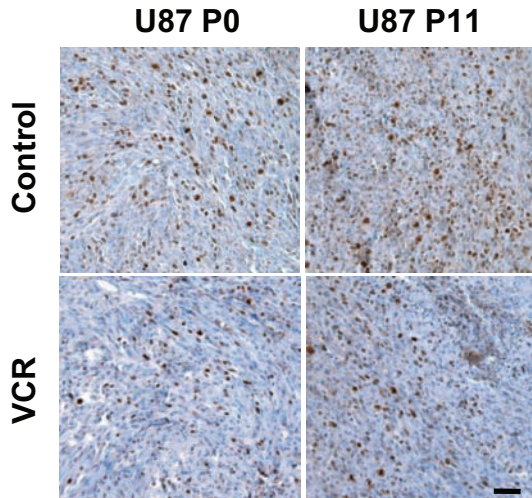

B

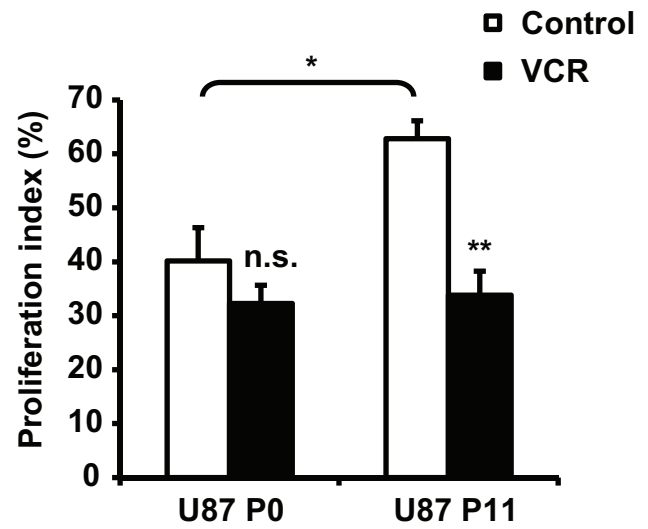

**Supplementary Figure S3: EB1 overexpression increases proliferation rate of U87-MG cells *in vivo* and sensitizes glioblastoma tumors to VCR anti-proliferative effects.** (A) Ki-67 staining of proliferative cells in EB1-overexpressing U87 P11 or control U87 P0 tumors and intravenously treated with VCR or vehicle. Bar = 50  $\mu$ m. (B) Proliferation index in the four groups. Bar  $\pm$  SEM. (\*) indicates significant differences from control: \* $p < 0.05$ ; \*\* $p < 0.005$ ; n.s.: non significant.

**A**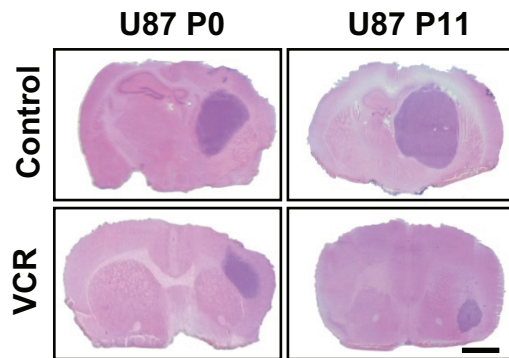**B**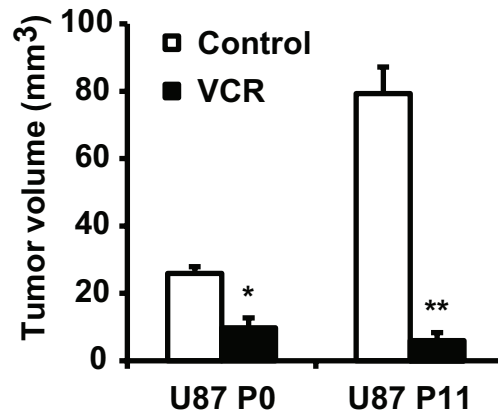

**Supplementary Figure S4: EB1 overexpression sensitizes glioblastoma cells to *Vinca*-alkaloid anti-tumor growth effect.** (A) Typical coronal sections of brains from mice intracerebrally grafted with EB1-overexpressing U87 P11 cells or control U87 P0 cells and intravenously treated with VCR or vehicle. Brains were recovered 21 days following cell transplantation. *Bar* = 1 mm. (B) Tumor volumes (mean  $\pm$  SEM of 3 animals per treatment group). \* $p < 0.05$ ; \*\* $p < 0.005$ .

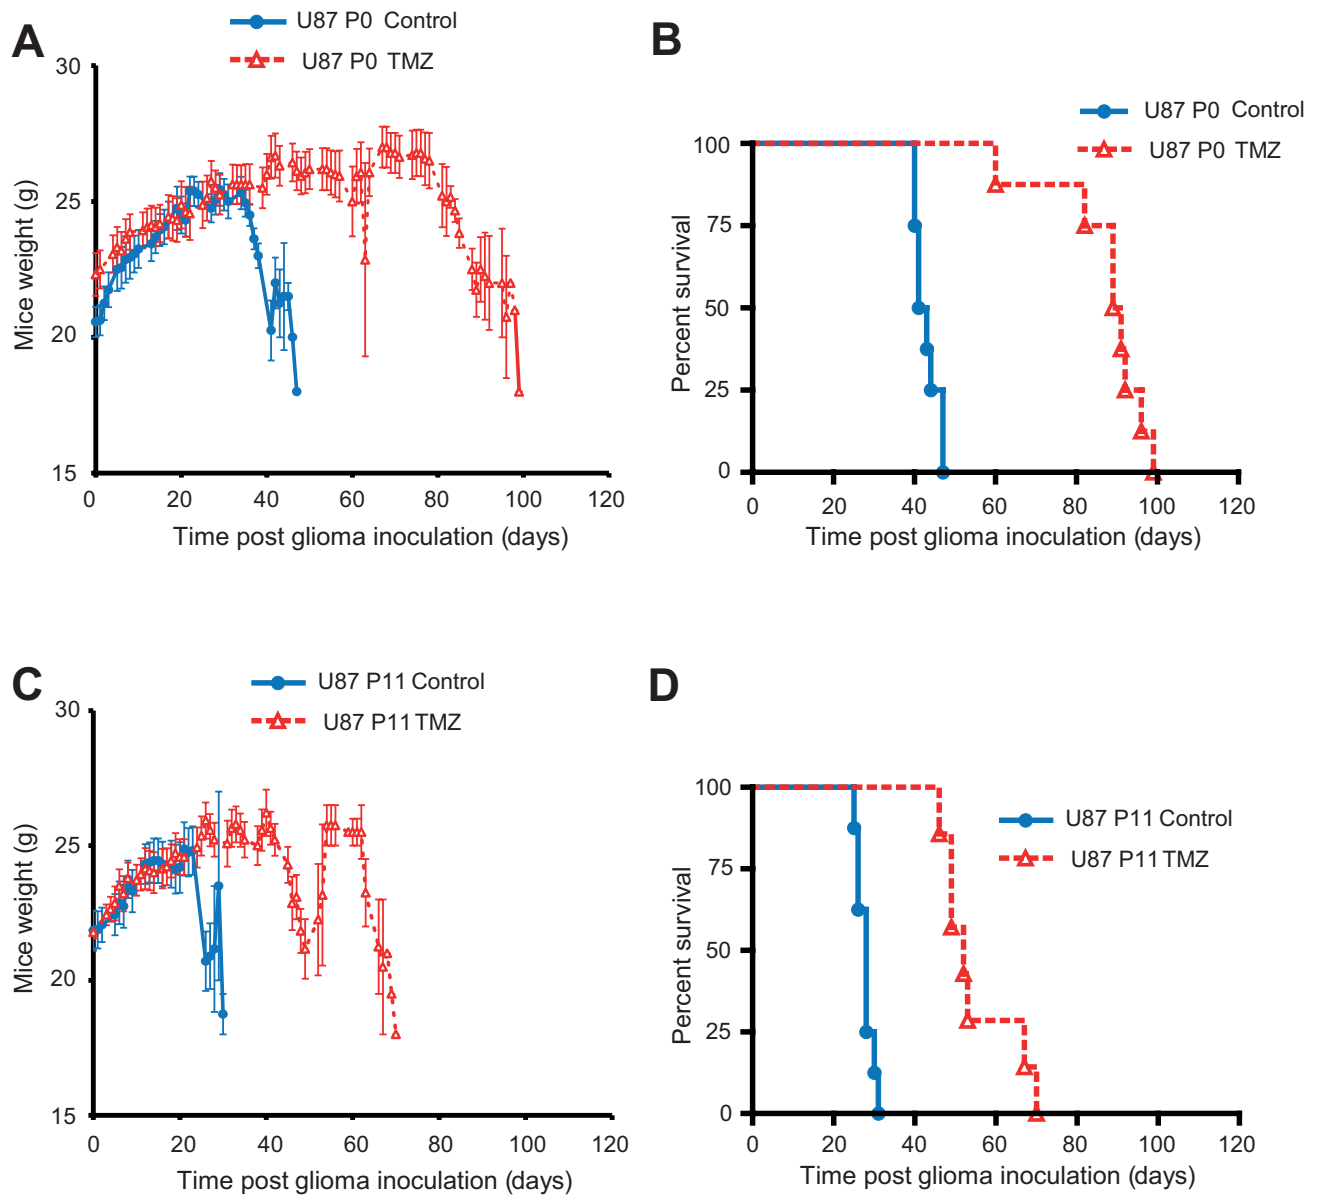

**Supplementary Figure S5: EB1 overexpression does not sensitize glioblastoma cells to TMZ anti-tumor growth effect.** Mean weights (A, C) and Kaplan–Meier survival plot (B, D) of control U87 P0 or EB1-overexpressing U87 P11 bearing mice intravenously treated with TMZ or vehicle. Bar  $\pm$  SEM.

**Supplementary Table S1. Estimate of Median OS and PFS according to EB1 glioblastoma sample scoring**

| EB1 score | Median OS            |                         |             | Median PFS           |                         |             |
|-----------|----------------------|-------------------------|-------------|----------------------|-------------------------|-------------|
|           | Estimate<br>(months) | 95% Confidence Interval |             | Estimate<br>(months) | 95% Confidence Interval |             |
|           |                      | Lower Bound             | Upper Bound |                      | Lower Bound             | Upper Bound |
| 0         | 25.62                | 5.714                   | 45.526      | 13.653               | 5.143                   | 22.162      |
| 1         | 13.421               | 12.524                  | 14.319      | 7.901                | 6.487                   | 9.315       |
| 2         | 10.909               | 8.992                   | 12.826      | 5.157                | 3.761                   | 6.553       |
| 3         | 10.248               | 6.914                   | 13.582      | 3.24                 | 1.062                   | 5.418       |

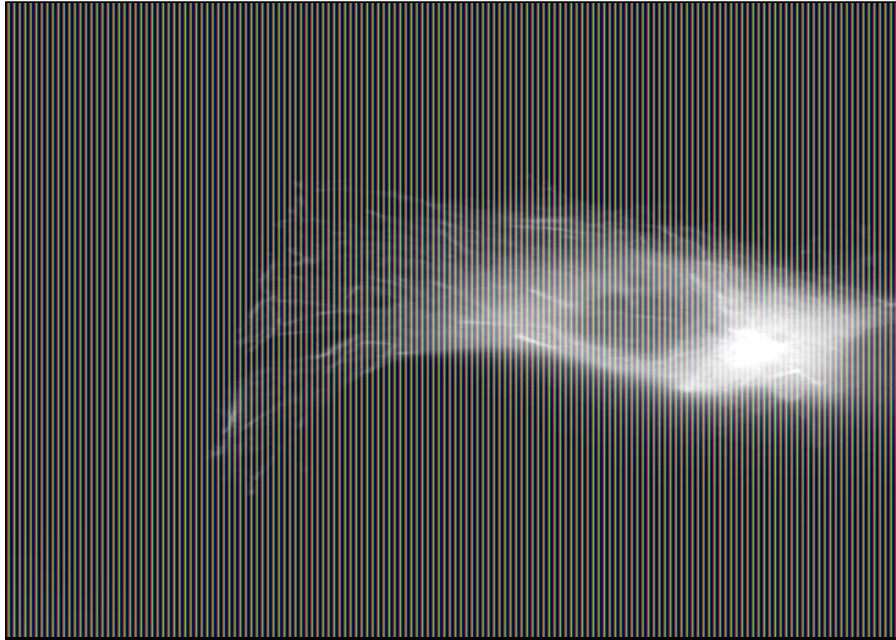

**Supplementary Movie S1: U87-P0 clone EB3-GFP transfected, control (10 frames/s).**

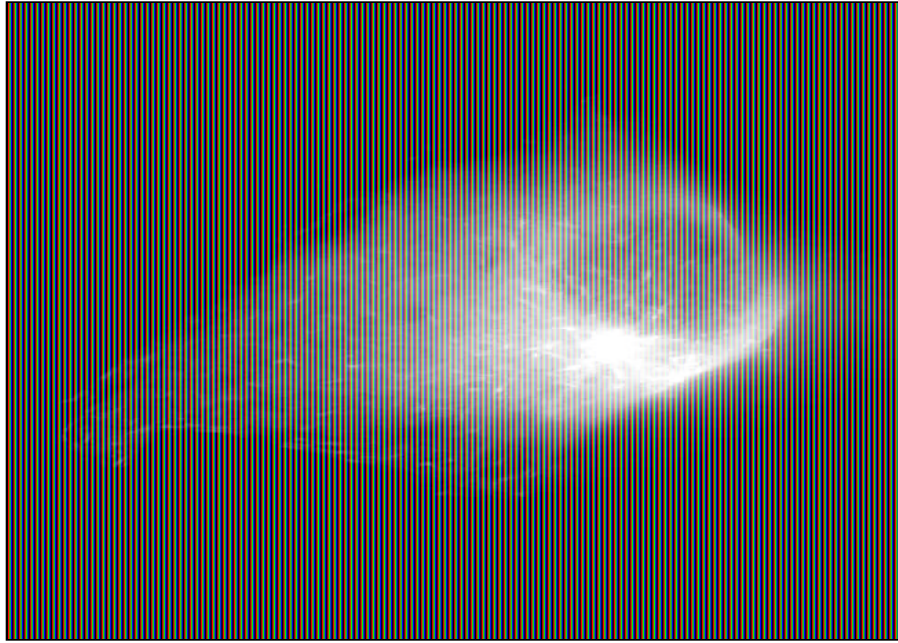

**Supplementary Movie S2: U87-P0 clone EB3-GFP transfected, treated with 1.6 nM VCR for 4 h (10 frames/s).**



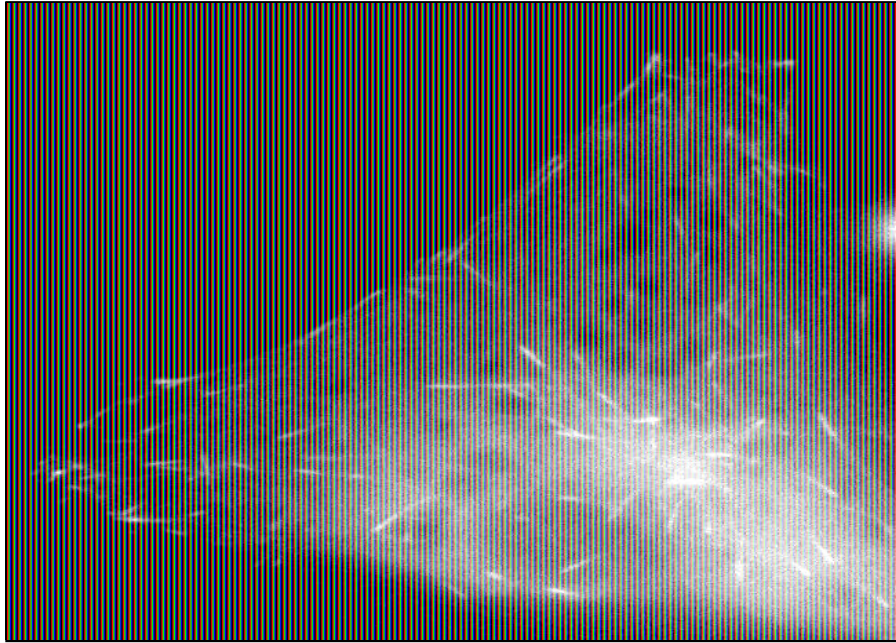

**Supplementary Movie S3: U87-P11 clone overexpressing EB1, EB3-GFP transfected, control (10 frames/s).**

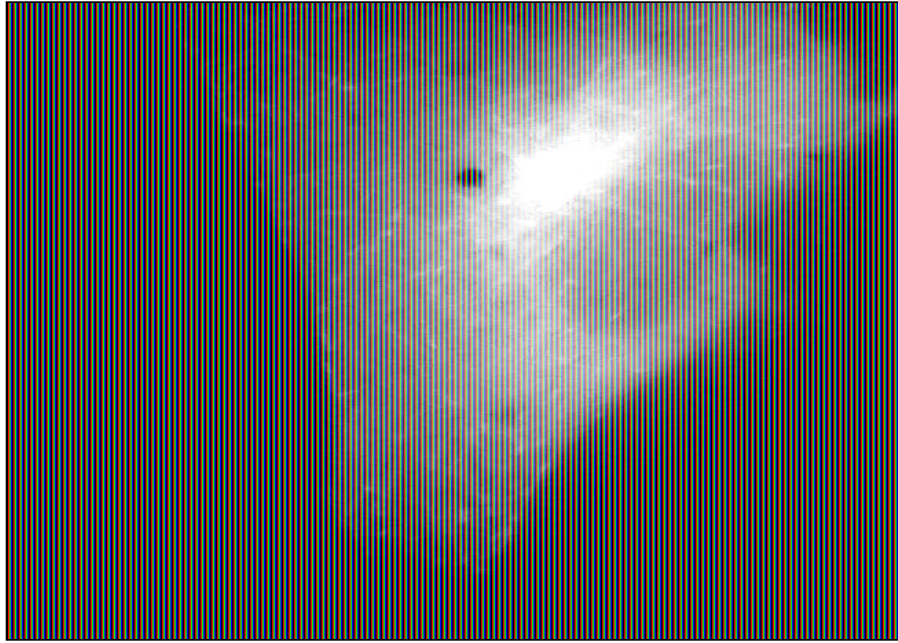

**Supplementary Movie S4: U87-P11 clone overexpressing EB1, EB3-GFP transfected, treated with 1.6 nM VCR for 4 h (10 frames/s).**
